# Supplementary material
Source: PubMed Central journal article supplement (PMC3689271)
Supplement: NIHMS484523-supplement-Supporting_Information.pdf [file NIHMS484523-supplement-Supporting_Information.pdf]

Figure S1.

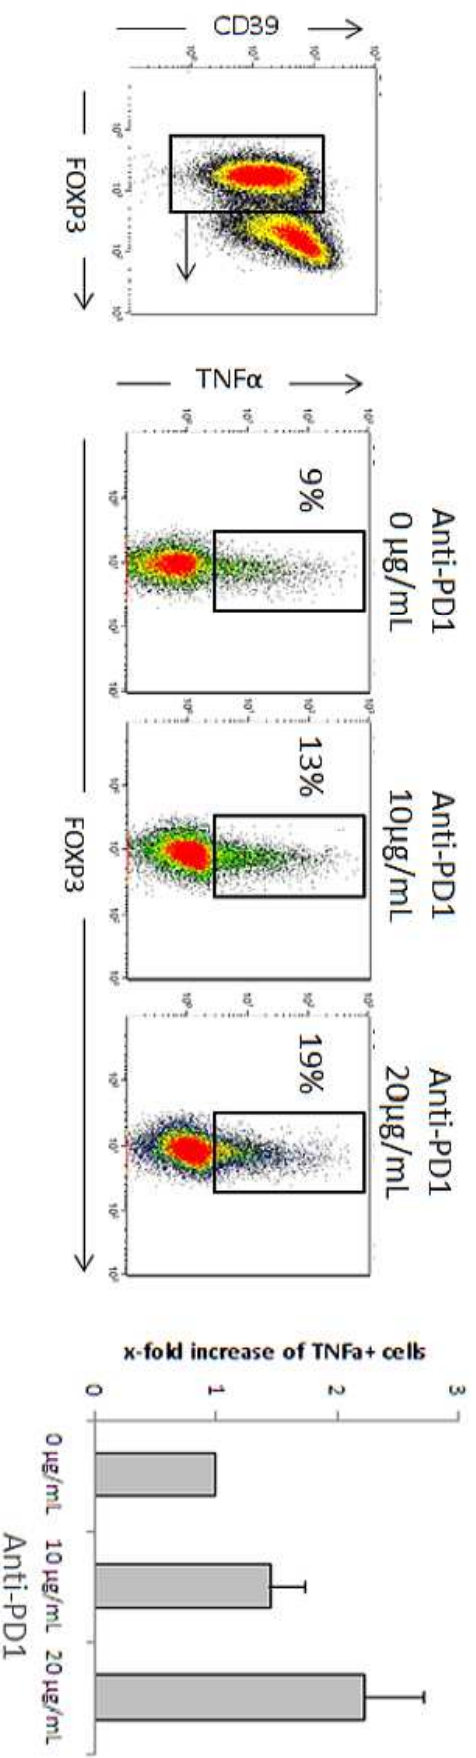

**Figure S1. Effects of anti-PD1 antibody on cytokine expression.** Expression of TNF- $\alpha$  in CD4<sup>+</sup>CD39<sup>+</sup>FOXP3<sup>neg</sup> T cell subset was significantly increased in the presence of anti-PD-1 antibody as shown. CD4<sup>+</sup>CD39<sup>+</sup> T cells were stimulated with SEB (1  $\mu$ g/ml) for 12 h and gates were set on CD4<sup>+</sup>CD39<sup>+</sup>FOXP3<sup>neg</sup> T cells. Box plots show results from one representative experiment of two performed with bar graphs showing means  $\pm$  SD (\* $p$  < 0.04).
